# Supplementary material for: Potentially Suitable Geographical Area for Monochamus alternatus under Current and Future Climatic Scenarios Based on Optimized MaxEnt Model
Source: MDPI journal article supplement (doi:10.3390/insects14020182), 2023-02-13
Supplement: s1 [file s1]

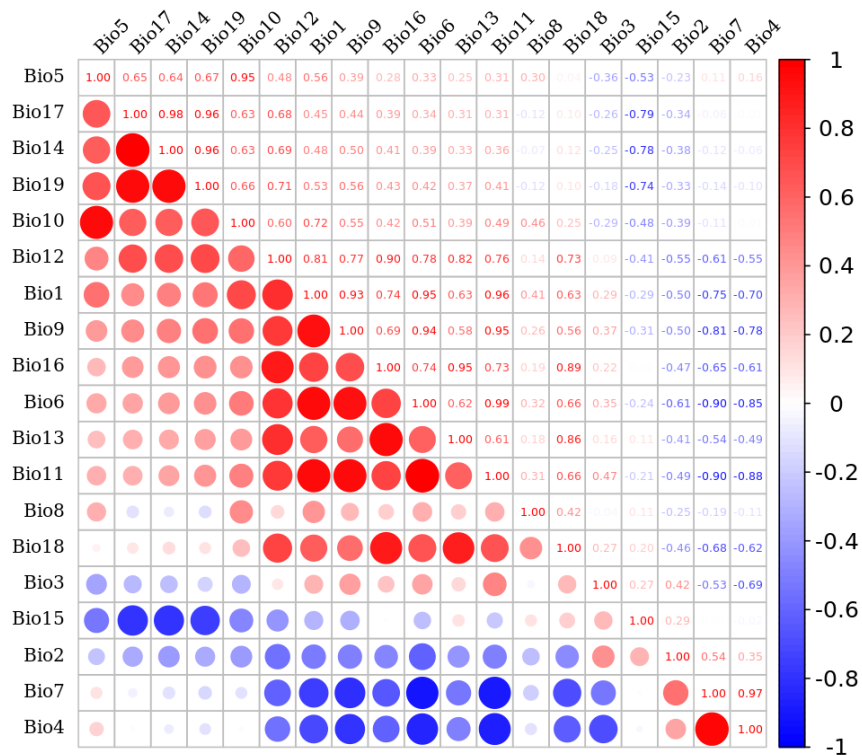

**Figure S1.** Pearson correlation analysis and correlation coefficients of 19 bioclimatic variables. The color of red means positive correlation, blue means negative correlation. The size of the circle means the strength of the correlation. Bio1 represents the Annual mean temperature, Bio2 represents the Monthly mean temperature difference, Bio3 represents the Isothermality, Bio4 represents the Temperature seasonality, Bio5 represents the Max temperature of warmest month, Bio6 represents the Min. temperature of the coldest month, Bio7 represents the Temperature annual range, Bio8 represents the Mean temperature of the wettest quarter, Bio9 represents the Mean temperature of driest quarter, Bio10 represents the Mean temperature of warmest quarter, Bio11 represents the Mean temperature of coldest quarter, Bio12 represents the Annual precipitation, Bio13 represents the Precipitation of wettest month, Bio14 represents the Precipitation of driest month, Bio15 represents the Precipitation seasonality, Bio16 represents the Precipitation of wettest quarter, Bio17 represents the Precipitation of driest quarter, Bio18 represents the Precipitation of warmest quarter, Bio19 represents the Precipitation of coldest quarter.

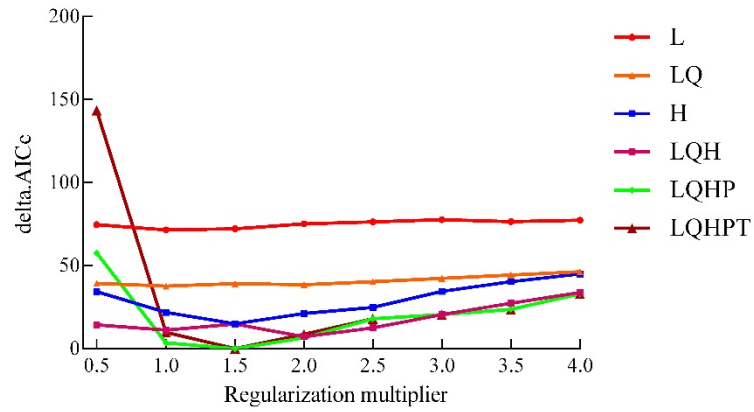

**Figure S2.** The  $\Delta AICc$  values of the 48 different combinations of the MaxEnt parameter settings.

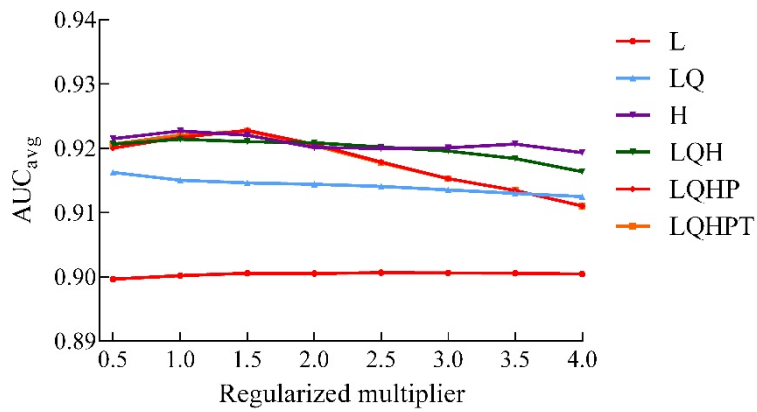

**Figure S3.** The  $AUC_{avg}$  values of the 48 different combinations of the MaxEnt parameter settings.

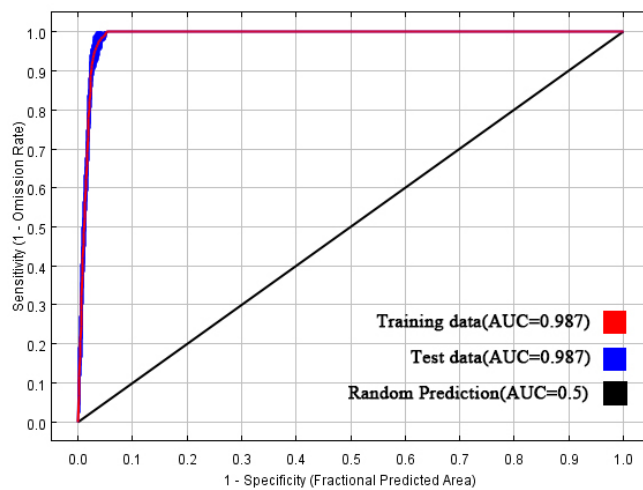

**Figure S4.** ROC curve and the values of AUC for the optimized MaxEnt model.

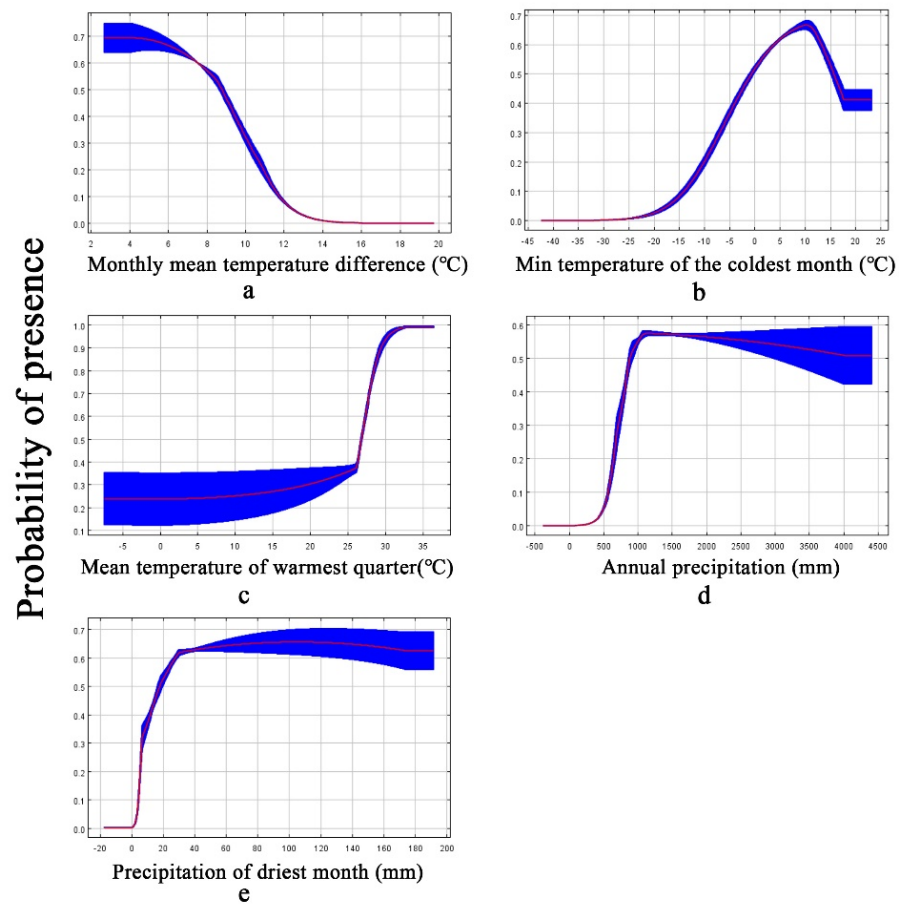

**Figure S5.** Response curves of the bioclimatic variables most related to the distribution of *M. alternatus*. (a) Response curve of monthly mean temperature difference (Bio2), (b) Response curve of minimum temperature of the coldest month (Bio6), (c) Response curve of mean temperature of warmest quarter (Bio10), (d) Response curve of annual precipitation (Bio12), (e) Response curve of precipitation of driest month (Bio14).

**Table S1.** The contribution rates of bioclimatic variables affecting the distribution of *M. alternatus*.

| <b>Code</b> | <b>Bioclimatic Variables</b>            | <b>Contribution<br/>rate/%</b> |
|-------------|-----------------------------------------|--------------------------------|
| Bio14       | Precipitation of driest month           | 46.4                           |
| Bio12       | Annual precipitation                    | 11.2                           |
| Bio6        | Min. temperature of the coldest month   | 9.2                            |
| Bio10       | Mean temperature of warmest quarter     | 7.2                            |
| Bio5        | Max temperature of warmest month        | 5.2                            |
| Bio4        | Temperature seasonality                 | 4.8                            |
| Bio8        | Mean temperature of the wettest quarter | 2.8                            |
| Bio1        | Annual mean temperature                 | 2.7                            |
| Bio2        | Monthly mean temperature difference     | 1.6                            |
| Bio19       | Precipitation of coldest quarter        | 1.4                            |
| Bio15       | Precipitation seasonality               | 1.3                            |
| Bio16       | Precipitation of wettest quarter        | 1.1                            |
| Bio11       | Mean temperature of coldest quarter     | 1                              |
| Bio7        | Temperature annual range                | 1                              |
| Bio17       | Precipitation of driest quarter         | 0.8                            |
| Bio9        | Mean temperature of driest quarter      | 0.8                            |
| Bio3        | Isothermality                           | 0.8                            |
| Bio18       | Precipitation of warmest quarter        | 0.4                            |
| Bio13       | Precipitation of wettest month          | 0.3                            |
